# Supplementary material
Source: publisher site journal article supplement (https://www.spandidos-publications.com/2943/downloadSupplementary)

Figure S1. Construction of stable PNO1 KD Eca-109 and TE-1 cells. Fluorescence images demonstrated that PNO1 expression was successfully knocked down in (A) Eca-109 and (B) TE-1 cells. (C and D) Reverse transcription-quantitative PCR and (E and F) western blotting were used to determine the successful silencing of PNO1 in (C and E) Eca-109 and (D and F) TE-1 cells. The data are presented as the mean  $\pm$  SD. \*\* $P < 0.01$ , \*\*\* $P < 0.001$ . PNO1, partner of NOB1 homolog; KD, knockdown; sh, short hairpin RNA; NC, negative control.

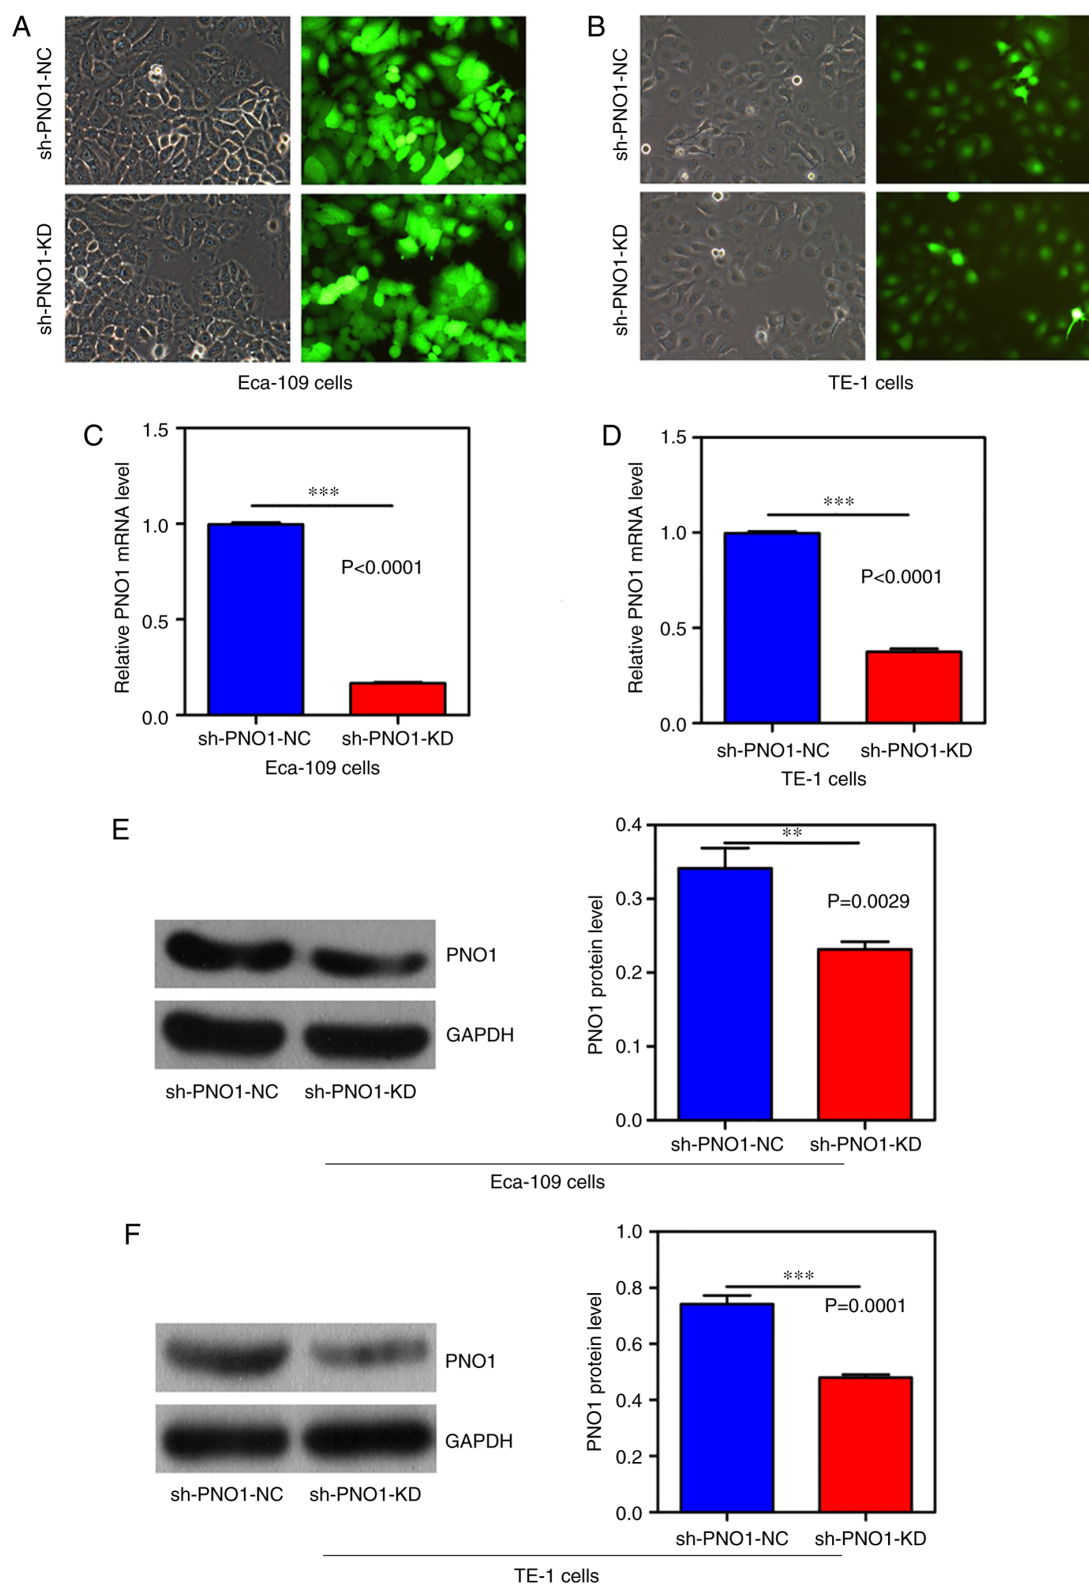

Supplement: Supplementary file 1 [file downloadSupplementary]
